# Supplementary material for: Exploring Alternative Treatment Choices for Multidrug-Resistant Clinical Strains of Helicobacter pylori in Mongolia
Source: MDPI journal article supplement (doi:10.3390/microorganisms11122852), 2023-11-24
Supplement: s1 [file s1]

# Supplementary Tables

**Supplementary Table S1:** Potential genotypes encoded in *gyrA* and *rpoB* genes of CIP-, MOXI-, and RFB-sensitive and -resistant *H. pylori* strains.

| Alleles     |          | Sensitive strains |     | Resistant strains |     | <i>p</i> -value   |
|-------------|----------|-------------------|-----|-------------------|-----|-------------------|
|             |          | n                 | %   | n                 | %   |                   |
| <i>gyrA</i> |          | 38                | 100 | 39                | 100 |                   |
|             | N87 K/I  | 1                 | 2.6 | 15                | 38  | <i>p</i> = 0.0001 |
|             | A88P     | 0                 | 0   | 1                 | 2.5 | ns                |
|             | D91N/Y/G | 1                 | 2.6 | 12                | 31  | <i>p</i> = 0.001  |
|             | Total    | 2                 | 5.2 | 28                | 79  | ns                |
| <i>rpoB</i> |          | 227               | 100 | 2                 | 100 |                   |
|             | D530N    | 0                 | 0   | 1                 | 50  | ns                |
|             | R701C    | 0                 | 0   | 1                 | 50  | ns                |
|             | Total    | 0                 | 0   | 2                 | 100 | ns                |

In this study, we included sequencing data of 77 quinolone-treated (*gyrA*) and 229 rifabutin-treated (*rpoB*) *H. pylori* strains. Statistical analysis was calculated with Fisher's exact test (*p* < 0.05); ns: no significance.

**Supplementary Table S2:** Hypothetical mutation alleles from 77 fluoroquinolone-treated (*gyrA* and *gyrB*) and 229 rifabutin-treated (*rpoB*) *H. pylori* strains.

| Hypothetical mutations  |                                                                                                                                                                        | Sensitive strains |     | Resistant strains |      | <i>p</i> -value  |
|-------------------------|------------------------------------------------------------------------------------------------------------------------------------------------------------------------|-------------------|-----|-------------------|------|------------------|
|                         |                                                                                                                                                                        | n                 | %   | n                 | %    |                  |
| <b><i>gyrA</i> gene</b> |                                                                                                                                                                        | 38                | 100 | 39                | 100  |                  |
| 1                       | V199I                                                                                                                                                                  | 2                 | 5.2 | 11                | 28.2 | <i>p</i> = 0.012 |
| 2                       | N660D                                                                                                                                                                  | 0                 | 0   | 8                 | 20.5 | <i>p</i> = 0.005 |
| 3                       | A524V                                                                                                                                                                  | 2                 | 5.2 | 7                 | 17.9 | ns               |
| 4                       | D610N                                                                                                                                                                  | 3                 | 7.8 | 6                 | 15.3 | ns               |
| 5                       | D143E                                                                                                                                                                  | 3                 | 7.8 | 5                 | 12.8 | ns               |
| 6                       | A801V                                                                                                                                                                  | 0                 | 0   | 4                 | 10.2 | ns               |
| 7                       | A379V                                                                                                                                                                  | 1                 | 2.6 | 4                 | 10.2 | ns               |
| 8                       | R486C, A654T, N791K                                                                                                                                                    | 1                 | 2.6 | 3                 | 7.6  | ns               |
| 9                       | A197V, P595S, H663Y, G712S, Q825L                                                                                                                                      | 0                 | 0   | 2                 | 5.1  | ns               |
| 10                      | V13I, A97V, R130K, P151S, A183V, A197T, D210N, R243C, I363T, A375T, M413I, T417I, D440Y, K443R, D464Y, L474F, K478R, S482Y/P, F616L, R625L, K662N, V702I, M776I, P816L | 0                 | 0   | 1                 | 2.5  | ns               |
| <b><i>gyrB</i> gene</b> |                                                                                                                                                                        | 38                | 100 | 39                | 100  |                  |
| 1                       | A584V                                                                                                                                                                  | 1                 | 2.6 | 6                 |      | ns               |
| 2                       | I619V                                                                                                                                                                  | 0                 | 0   | 4                 | 10.2 | ns               |
| 3                       | V31I, T51R, D63E                                                                                                                                                       | 2                 | 5.2 | 4                 | 10.2 | ns               |
| 4                       | A345T, A584T, N685D                                                                                                                                                    | 1                 | 2.6 | 3                 | 7.6  | ns               |
| 5                       | S240A, A259T, Y670C                                                                                                                                                    | 0                 | 0   | 2                 | 5.1  | ns               |
| 6                       | E327D                                                                                                                                                                  | 1                 | 2.6 | 2                 | 5.1  | ns               |
| 7                       | E16D, N58S, R127H, T167I, F171L, M194T, E208G, Q213R, E277D, E305D, M572T, K605N, D606E/N, M676T, K726R, S730N, K741R                                                  | 0                 | 0   | 1                 | 2.5  | ns               |
| <b><i>rpoB</i> gene</b> |                                                                                                                                                                        | 227               | 100 | 2                 | 100  |                  |
| 1                       | E470G, L2196P                                                                                                                                                          | 0                 | 0   | 1                 | 50   | ns               |
| 2                       | S273P                                                                                                                                                                  | 2                 | 0.9 | 1                 | 50   | ns               |
| 3                       | A1173T, A2710P                                                                                                                                                         | 3                 | 1.3 | 1                 | 50   | ns               |

ns: no significance.
